# Supplementary material for: Chirality reversal, enhancement and transfer by pH-adjusted surfactant assembly
Source: Royal Society of Chemistry journal article supplement (doi:10.1039/d0cc07008d), 2020-01-01
Supplement: d0cc07008d1.pdf [file d0cc07008d1.pdf]

## Supporting Information

### Chirality reversed and enhanced by pH-sensitive surfactant self-assembly

Zhanglang Zhou,<sup>a,b</sup> Jin Zhou,<sup>b</sup> Lan Chen,<sup>\*b</sup> Qian Zhao,<sup>a</sup> Chun Zhang<sup>a</sup> and Guanglu Ge<sup>\*b</sup>

#### 1 Experimental

##### 1.1 Materials

All the chemicals were purchased from Sigma-Aldrich, Energy Chemical and Innochem. All chemicals were used as received, and all solutions were prepared with deionized water (18 MΩ·cm).

##### 1.2 Synthesis and characterization of chiral N-Tetradecanoyl-Alanine

1.2.1 Synthesis. Both TD-L-AlaA and TD-D-AlaA were synthesized according to the previous publication.<sup>1</sup>

1.2.2 Characterizations. <sup>1</sup>H NMR spectra were recorded on a Bruker Advance III 400 (400 MHz) spectrometer. Mass spectra were performed on Q-Exactive mass spectrometry instrument. XRD analysis was performed on D/MAX-TTRIII(CBO) X-ray diffractometer. UV spectra were obtained on LAMBDA650 spectrophotometer. TEM and AFM images were captured with a Tecnai G2 20 S-TWIN operating at an acceleration voltage of 200 kV and Bruker Multimode-8, respectively. The pH measurements were performed with METTLER TOLEDO pH meter FE20. PL spectra were measured by NanoLOG-TCSPC. JASCO J-1500 CD spectrometer was used to obtain CD spectra. CPL measurements were performed with a JASCO CPL-200 spectrometer.

## 1 CD analysis

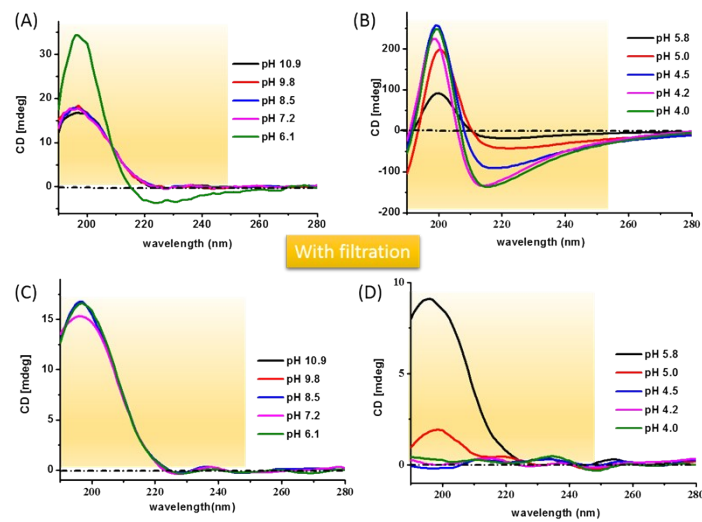

**Fig. S1** CD spectra for 0.15mM TD-D-AlaA at different pH (A) (B) without filtration and (C) (D) after filtration.

## 2 Morphology analysis

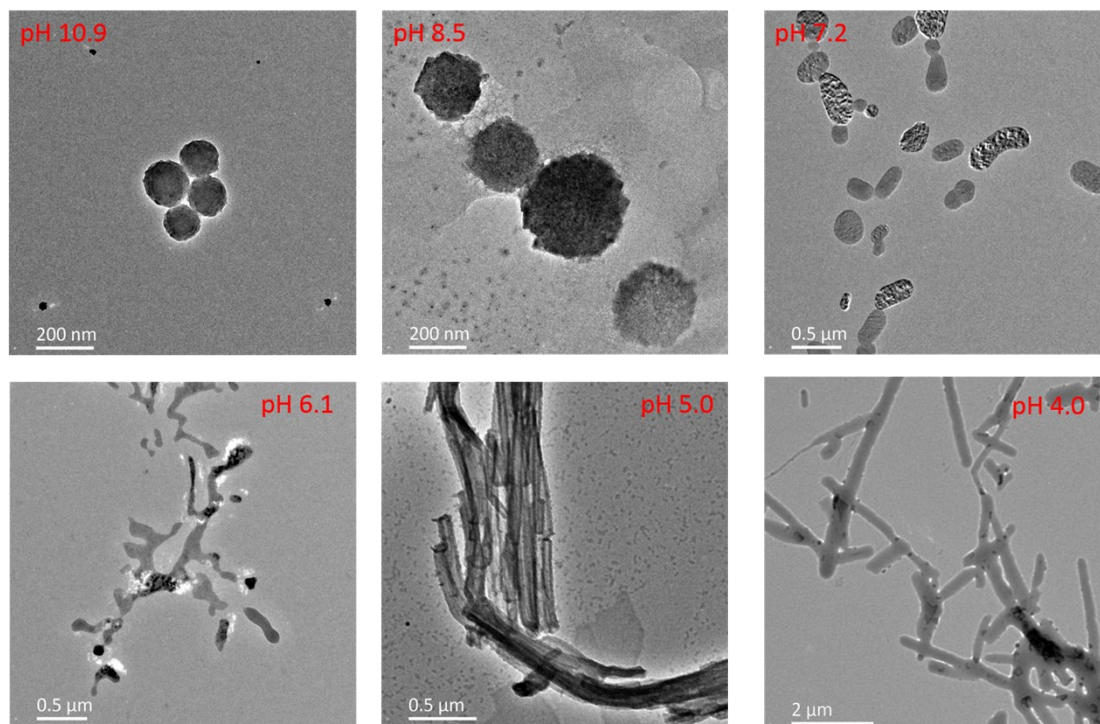

**Fig. S2** TEM images for 0.15mM TD-D-AlaA in different pH.

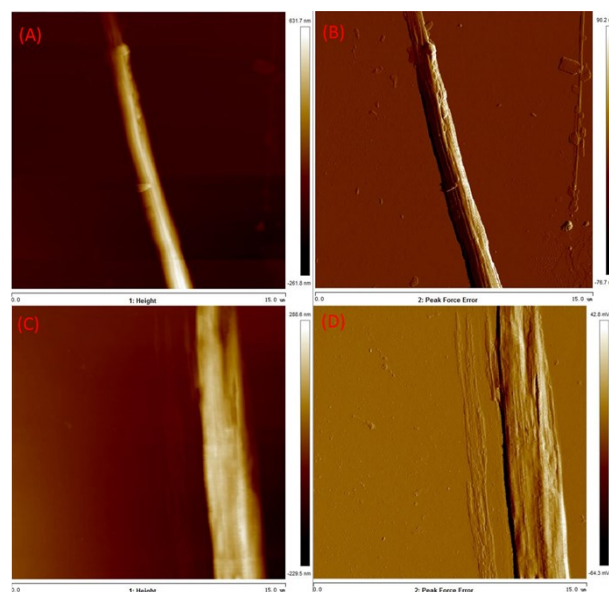

**Fig. S3** Height and peak force error AFM images for 0.15mM (A) (B) TD-L-AlaA and (C) (D) TD-D-AlaA at pH 4.0.

### 3 Repeatable analysis

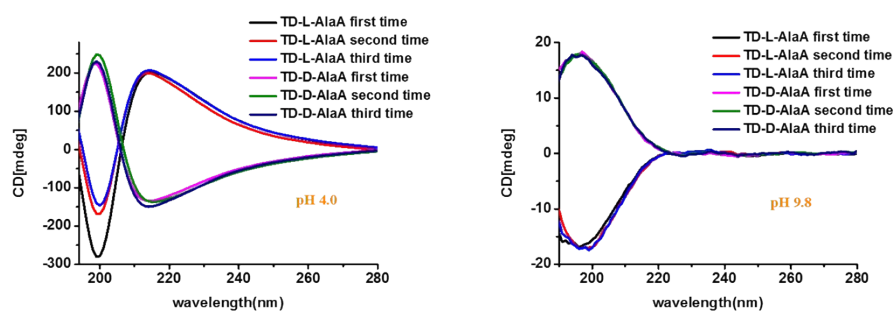

**Fig.S4** CD spectra of TD- L/D-AlaA at (A) pH 4.0 and (B) pH 9.8.

### 4 XRD analysis

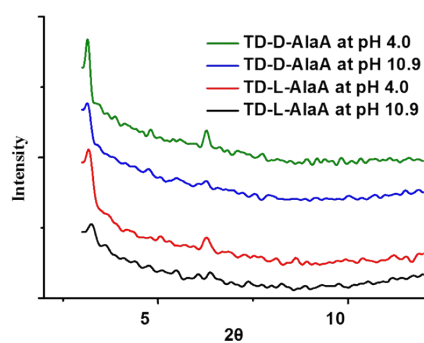

**Fig. S5** XRD analysis of TD-AlaA at different pH.

## 5 DLS analysis

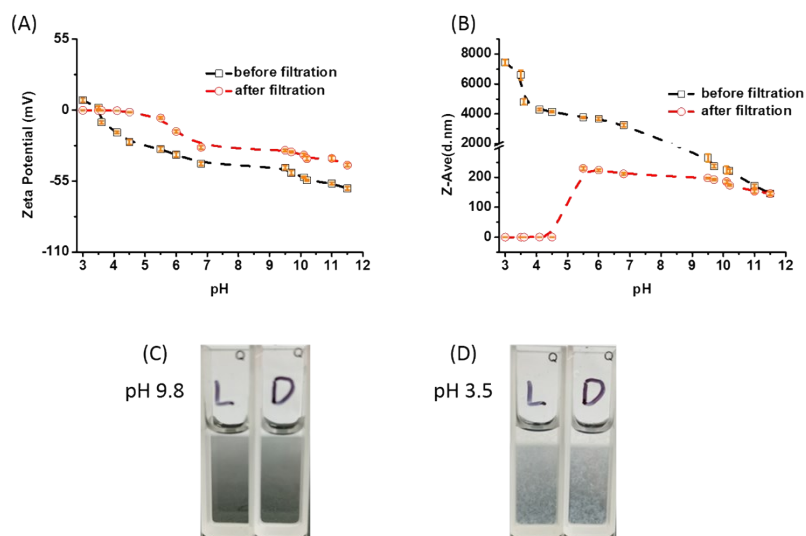

**Fig.S6** (A) Zeta potential and (B) size for 0.15mM TD-D-AlaA at different pH measured by DLS before and after filtration.

## 6 CPL analysis

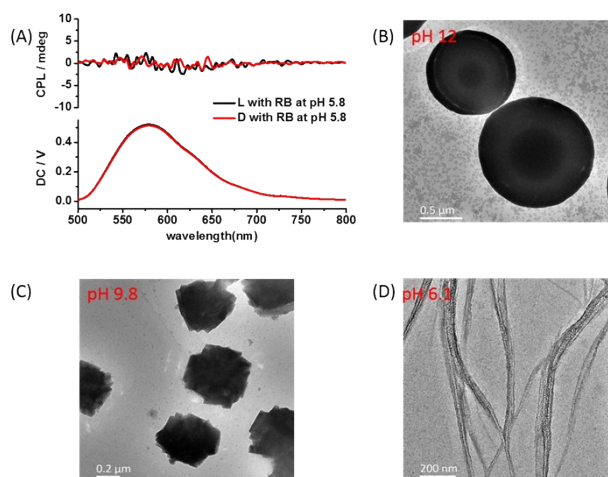

**Fig.S7** (A) CPL spectra for TD-AlaA<sup>-</sup> and Rhodamine B at pH 5.8; (B) (C) (D) TEM of TD-D-AlaA with Rhodamine B at different pH.

## 7 UV analysis

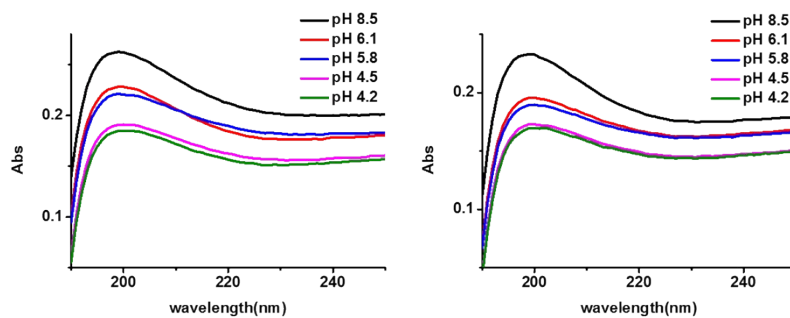

**Fig.S8** UV spectra of TD- L/D-AlaA at different pH.

## 8 Molecular composition analysis

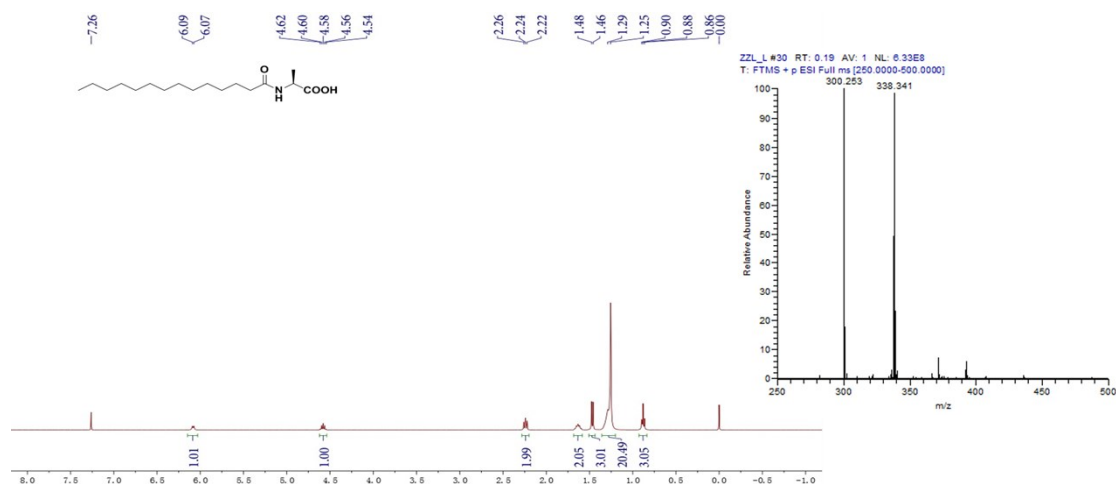

**Fig.S9** NMR and MS spectra of TD-L-AlaA.

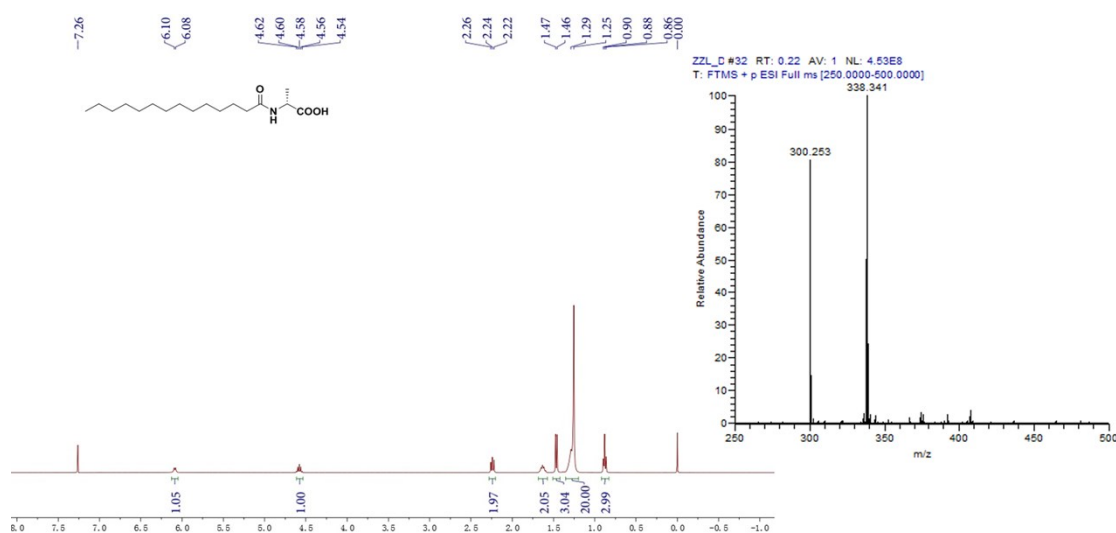

**Fig.S10** NMR and MS spectra of TD-D-AlaA.

## Notes and references

1. Y. X. Li, S. G. Fu, J. H. Zhang, S. M. Xie, L. Li, Y. Y. He, M. Zi and L. M. Yuan, *J Chromatogr A*, 2018, **1557**, 99-106.
